# Supplementary material for: One-year outcomes in cardiogenic shock triggered by ventricular arrhythmia: An analysis of the FRENSHOCK multicenter prospective registry
Source: PubMed Central journal article supplement (PMC9909601; doi:10.3389/fcvm.2023.1092904), 2023-01-26
Supplement: Data_Sheet_1.pdf [file Data_Sheet_1.pdf]

## Supplemental material

**One-year outcomes in cardiogenic shock triggered by ventricular arrhythmia: an analysis of the FRENSHOCK multicenter prospective registry**, by Miloud Cherbi et al.

**Table S1:** Distribution of cardiogenic shock triggers between groups

**Table S2:** Clinical, echocardiographic, and biological parameters at 24h according to cardiogenic shock triggers

**Table S3:** Covariates used in the propensity score matching.

**Table S4:** Baseline characteristics at admission according to cardiogenic shock triggers (VA versus non-VA) after propensity score matching.

**Table S5:** Clinical, echocardiographic, and biological parameters at admission in the VA-triggered group according to cardiomyopathy.

**Table S6:** Clinical, echocardiographic, and biological parameters at 24h in the VA-triggered group according to cardiomyopathy.

**Table S7:** In-hospital management, short and long-term outcomes in the VA-triggered CS group according to the type of cardiomyopathy.

**Table S8:** Antiarrhythmic therapies in the VA group according to cardiomyopathy

**Table S9:** Short and long-term outcomes in the VA group according to troponin level.

**Figure S1:** All-cause mortality in the matched cohort according to a ventricular arrhythmia trigger

**Figure S2:** Mortality outcomes in the VA group according to various types of ischemic heart disease.

**Figure S3:** Mortality outcomes in the VA group according to troponin level



**Table S1** Distribution of cardiogenic shock triggers between groups.

|                                     | VA-triggered CS<br>(n = 94) | Non-VA triggered CS<br>(n = 675) |
|-------------------------------------|-----------------------------|----------------------------------|
| Ischemic, n (%)                     | 40 (42.6)                   | 216 (32.0)                       |
| Mechanical complications, n (%)     | 5 (5.3)                     | 19 (2.8)                         |
| Supra-ventricular arrhythmia, n (%) | 0 (0)                       | 100 (14.8)                       |
| Conduction disorder, n (%)          | 5 (5.3)                     | 13 (1.9)                         |
| Infectious disease, n (%)           | 1 (1.1)                     | 91 (13.5)                        |
| Non-compliance, n (%)               | 3 (3.2)                     | 24 (3.6)                         |
| Iatrogenesis, n (%)                 | 3 (3.2)                     | 44 (6.5)                         |

Underlying cardiopathy was considered ischemic in the presence of at least one culprit lesion hemodynamically significant on coronary angiography (stenosis or thrombosis).

CS = cardiogenic shock, VA = ventricular arrhythmia

**Table S2 Clinical, echocardiographic, and biological parameters at 24h according to cardiogenic shock triggers.**

|                                  | Overall population<br>(n = 769)     | VA-triggered CS<br>(n = 94)        | Non-VA triggered CS<br>(n = 675)    | p value* |
|----------------------------------|-------------------------------------|------------------------------------|-------------------------------------|----------|
| Clinical presentation at 24h     |                                     |                                    |                                     |          |
| Heart rate, mean ± SD, bpm       | 94.7 ± 23.5 (n = 680)               | 91.0 ± 26.0 (n = 83)               | 95.3 ± 23.1 (n = 597)               | 0.08     |
| SBP, mean ± SD, mmHg             | 105.1 ± 20.3 (n = 682)              | 103.9 ± 21.1 (n = 83)              | 105.2 ± 20.2 (n = 599)              | 0.49     |
| DBP, mean ± SD, mmHg             | 61.8 ± 12.9 (n = 681)               | 60.5 ± 12.3 (n = 83)               | 61.9 ± 13.0 (n = 598)               | 0.34     |
| MBP, mean ± SD, mmHg             | 75.4 ± 13.9 (n = 679)               | 74.2 ± 13.3 (n = 83)               | 75.5 ± 13.9 (n = 596)               | 0.33     |
| Sinus rhythm, n (%)              | 376 (61.9) (n = 607)                | 42 (62.7) (n = 67)                 | 334 (61.9) (n = 540)                | 1        |
| Mottling, n (%)                  | 115 (20.1) (n = 572)                | 14 (21.2) (n = 66)                 | 101 (20.0) (n = 506)                | 0.94     |
| Blood tests at 24h, median (IQR) |                                     |                                    |                                     |          |
| Sodium, mmol/L                   | 136 (133 - 140) (n = 688)           | 137 (134.5 - 140) (n = 83)         | 136 (133 - 139) (n = 605)           | 0.05     |
| Creatinin, µmol/L                | 128 (92 - 186.8) (n = 686)          | 106 (84.5 - 168) (n = 83)          | 129 (94 - 189) (n = 603)            | 0.04     |
| Bilirubin, mg/L                  | 17 (10 - 29) (n = 416)              | 15.5 (11 - 26.5) (n = 57)          | 18 (10 - 29) (n = 359)              | 0.56     |
| Hemoglobin, g/dL                 | 12 (10 - 13.5) (n = 503)            | 12 (10 - 13.8) (n = 68)            | 12 (10 - 13.5) (n = 435)            | 0.59     |
| Arterial blood lactates, mmol/L  | 2 (1.1 - 2.5) (n = 362)             | 1.9 (1 - 2.2) (n = 56)             | 2 (1.1 - 2.6) (n = 306)             | 0.27     |
| ASAT, UI/L                       | 113.5 (42 - 426) (n = 448)          | 127 (44 - 561) ± 857.0 (n = 57)    | 113 (42 - 419.5) (n = 391)          | 0.75     |
| ALAT, UI/L                       | 73 (30.25 - 248) (n = 454)          | 93 (41.5 - 279.5) ± 884.7 (n = 59) | 70 (29 - 241.5) (n = 395)           | 0.24     |
| PT, %                            | 61 (39 - 75) (n = 634)              | 70 (45 - 84) (n = 79)              | 60 (38 - 73.5) (n = 555)            | < 0.01   |
| Nt-proBNP, pg/mL                 | 9,292 (5,539.5 - 18,582.5) (n = 87) | 6,640 (3,558 - 15,170) (n = 13)    | 9,371 (5,711.8 - 18,636.8) (n = 74) | 0.36     |
| BNP, pg/mL                       | 1,254 (691 - 2,178) (n = 123)       | 14,09 (466.75 - 2,207) (n = 16)    | 1,191 (693.5 - 2,096.5) (n = 107)   | 0.95     |
| CRP, mg/L                        | 47.5 (25 - 118.25) (n = 236)        | 37 (15-88) (n = 25)                | 48 (27 - 121.5) (n = 211)           | 0.22     |
| Echocardiography at 24h          |                                     |                                    |                                     |          |
| LVEF, mean ± SD, %               | 27.9 ± 13.4 (n = 500)               | 28.4 ± 13.7 (n = 61)               | 27.8 ± 13.3 (n = 439)               | 0.65     |
| TAPSE, median (IQR), mm          | 14 (11 - 18) (n = 141)              | 14 (11.5 - 18.5) (n = 19)          | 14 (11 - 17) (n = 122)              | 0.70     |
| PSVtdi, median (IQR), cm/s       | 10 (8 - 12) (n = 114)               | 10 (9 - 14) (n = 13)               | 10 (8 - 12) (n = 101)               | 0.25     |

\*p value refers to the comparison between VA and non-VA triggered CS.

ALAT = alanine aminotransferase, ASAT = aspartate aminotransferase, BNP = Brain natriuretic peptide, CRP = C-reactive protein, CS = cardiogenic shock, DBP = diastolic blood pressure, IQR = interquartile range, MBP = mean blood pressure, Nt-proBNP = N-terminal-pro hormone BNP, LVEF = left ventricular ejection fraction, PSVtdi = peak systolic velocity tissue Doppler imaging, PT = prothrombin time, SBP = systolic blood pressure, SD = standard deviation, TAPSE = tricuspid annular plane systolic excursion, VA = ventricular arrhythmia

**Table S3** Covariates used in the propensity score matching

|                                          | Before matching          |                               |                              | After matching           |                               |                              |
|------------------------------------------|--------------------------|-------------------------------|------------------------------|--------------------------|-------------------------------|------------------------------|
|                                          | VA-triggered CS (n = 94) | Non-VA triggered CS (n = 675) | Standardized mean difference | VA-triggered CS (n = 94) | Non-VA triggered CS (n = 564) | Standardized mean difference |
| Age, mean $\pm$ SD                       | 64.1 $\pm$ 14.5          | 66.0 $\pm$ 14.9               | - 0.1315                     | 64.1 $\pm$ 14.5          | 65.1 $\pm$ 15.1               | - 0.0691                     |
| Male, n (%)                              | 549 (71.4)               | 487 (72.1)                    | - 0.1306                     | 549 (71.4)               | 386 (68.4)                    | - 0.0524                     |
| LVEF $\leq$ 40%, n (%)                   | 82 (87.2)                | 578 (85.6)                    | 0.0481                       | 82 (87.2)                | 487 (86.3)                    | 0.0266                       |
| History of ischemic heart disease, n (%) | 24 (25.5)                | 206 (30.5)                    | - 0.0888                     | 24 (25.5)                | 169 (30.0)                    | - 0.0762                     |
| Previous ICD, n (%)                      | 14 (14.9)                | 113 (16.7)                    | - 0.0519                     | 14 (14.9)                | 89 (15.8)                     | - 0.0249                     |

The propensity score for each patient was estimated using a multivariable logistic regression model including 5 covariates (sex, age, history of ischemic heart disease, LVEF  $\leq$  40% at admission and previous ICD) that were prognostically important for the outcome. Subjects were matched using greedy nearest neighbor matching with 6:1 ratio and a caliper distance of 0.2 times the SD of the logit of the propensity score.

CS = cardiogenic shock, ICD = implantable cardiac defibrillator, LVEF = left ventricular ejection fraction, SD = standard deviation, VA = ventricular arrhythmia

**Table S4** Baseline characteristics at admission according to cardiogenic shock triggers (VA versus non-VA) after propensity score matching

|                                               | Overall population<br>(n = 658) | VA-triggered CS<br>(n = 94) | Non-VA triggered CS<br>(n = 564) | p value* |
|-----------------------------------------------|---------------------------------|-----------------------------|----------------------------------|----------|
| Age, mean ± SD, years                         | 65 ± 15                         | 64.1 ± 14.5                 | 65.1 ± 15.1                      | 0.52     |
| Male, n (%)                                   | 448 (68.1)                      | 62 (66.0)                   | 386 (68.4)                       | 0.72     |
| Body mass index, mean ± SD, kg/m <sup>2</sup> | 25.7 ± 5.6 (n = 634)            | 25.8 ± 4.6 (n = 88)         | 25.7 ± 5.7 (n = 546)             | 0.37     |
| Risk factors, n (%)                           |                                 |                             |                                  |          |
| Diabetes mellitus                             | 178 (27.1) (n = 656)            | 23 (24.5)                   | 155 (27.6) (n = 562)             | 0.62     |
| Hypertension                                  | 298 (45.4) (n = 657)            | 38 (40.4)                   | 260 (46.2) (n = 563)             | 0.35     |
| Dyslipidemia                                  | 222 (33.8) (n = 657)            | 38 (40.4)                   | 184 (32.7) (n = 563)             | 0.18     |
| Current smoker                                | 176 (27.8) (n = 632)            | 29 (31.9) (n = 91)          | 147 (27.2) (n = 541)             | 0.42     |
| Medical history, n (%)                        |                                 |                             |                                  |          |
| Peripheral artery disease                     | 76 (11.6) (n = 657)             | 8 (8.5)                     | 68 (12.1) (n = 563)              | 0.41     |
| Myocardial revascularization                  | 163 (24.8) (n = 657)            | 21 (22.3)                   | 142 (25.2) (n = 563)             | 0.64     |
| Chronic kidney failure                        | 134 (20.4) (n = 657)            | 13 (13.8)                   | 121 (21.5) (n = 563)             | 0.12     |
| ICD                                           | 103 (15.7)                      | 14 (14.9)                   | 89 (15.8)                        | 0.95     |
| COPD                                          | 40 (6.1) (n = 657)              | 4 (4.3)                     | 36 (6.4) (n = 563)               | 0.57     |
| Active cancer                                 | 44 (7) (n = 657)                | 5 (5.3)                     | 39 (6.9) (n = 563)               | 0.72     |
| Stroke                                        | 56 (9.9) (n = 657)              | 9 (9.6)                     | 47 (8.3) (n = 563)               | 0.85     |
| History of cardiac disease, n (%)             |                                 |                             |                                  |          |
| All causes                                    | 354 (53.9) (n = 657)            | 47 (50.0)                   | 307 (54.5) (n = 563)             | 0.48     |
| Ischemic                                      | 193 (29.3)                      | 24 (25.5)                   | 169 (30)                         | 0.45     |
| Hypertrophic                                  | 9 (1.4) (n = 657)               | 1 (1.1)                     | 8 (1.4) (n = 563)                | 1        |
| Toxic                                         | 30 (4.6) (n = 657)              | 4 (4.3)                     | 26 (4.6) (n = 563)               | 1        |
| Idiopathic                                    | 70 (10.7) (n = 657)             | 12 (12.8)                   | 58 (10.3) (n = 563)              | 0.59     |

| Previous medications, n (%) |                      |                    |                      |       |
|-----------------------------|----------------------|--------------------|----------------------|-------|
| Aspirin                     | 243 (37) (n = 656)   | 37 (39.4)          | 206 (36.7) (n = 562) | 0.7   |
| P2Y12 inhibitors            | 102 (18.1) (n = 656) | 20 (21.3)          | 82 (14.6) (n = 562)  | 0.13  |
| Vitamin K antagonist        | 137 (20.9) (n = 656) | 12 (12.8)          | 125 (22.2) (n = 562) | 0.051 |
| Direct oral anticoagulant   | 47 (8.4) (n = 656)   | 5 (5.3)            | 42 (7.5) (n = 562)   | 0.59  |
| ACEi or ARB                 | 237 (36.1) (n = 656) | 33 (35.1)          | 204 (36.3) (n = 562) | 0.92  |
| Sacubitril/valsartan        | 13 (2.1) (n = 632)   | 1 (1.1) (n = 91)   | 12 (2.2) (n = 541)   | 0.7   |
| Statins                     | 229 (34.9) (n = 656) | 38 (40.4)          | 191 (34) (n = 562)   | 0.27  |
| Beta blockers               | 263 (40.1) (n = 656) | 38 (40.4)          | 225 (40) (n = 562)   | 1     |
| Loop diuretics              | 310 (47.3) (n = 656) | 40 (42.6)          | 270 (48) (n = 562)   | 0.38  |
| Aldosterone antagonist      | 88 (13.4) (n = 656)  | 10 (10.6)          | 78 (13.9) (n = 562)  | 0.49  |
| Thiazide diuretics          | 34 (5.3) (n = 641)   | 6 (6.5) (n = 93)   | 28 (5.1) (n = 548)   | 0.62  |
| Non-dihydropyridine CCB     | 10 (1.6) (n = 639)   | 0 (0) (n = 93)     | 10 (1.8) (n = 546)   | 0.37  |
| Amiodarone                  | 107 (16.7) (n = 640) | 21 (22.6) (n = 93) | 86 (15.7) (n = 547)  | 0.14  |
| Other antiarrhythmic        | 26 (4.1) (n = 636)   | 7 (7.5) (n = 93)   | 19 (3.5) (n = 543)   | 0.09  |

\*p value refers to the comparison between VA and non-VA triggered CS.

ACEi = angiotensin-converting enzyme inhibitor, ARB, angiotensin receptor blocker, CCB = calcium channel blocker, COPD = chronic obstructive pulmonary disease, CS = cardiogenic shock, ICD = implantable cardiac defibrillator, SD = standard deviation, VA = ventricular arrhythmia



**Table S5** Clinical, echocardiographic, and biological parameters at admission in the VA-triggered group according to cardiomyopathy.

|                                               | Ischemic VA-triggered CS<br>(n = 40) | Non-ischemic VA triggered CS<br>(n = 54) | p value |
|-----------------------------------------------|--------------------------------------|------------------------------------------|---------|
| Age, mean ± SD, years                         | 66.2 ± 12.2                          | 62.5 ± 15.9                              | 0.54    |
| Male, n (%)                                   | 26 (65)                              | 36 (66.7)                                | 1       |
| Body mass index, mean ± SD, kg/m <sup>2</sup> | 26.5 ± 4.6 (n = 37)                  | 25.3 ± 4.7 (n = 51)                      | 0.18    |
| Risk factors, n (%)                           |                                      |                                          |         |
| Diabetes mellitus                             | 12 (30)                              | 11 (20.4)                                | 0.41    |
| Hypertension                                  | 18 (45)                              | 20 (37.0)                                | 0.57    |
| Dyslipidemia                                  | 15 (37.5)                            | 23 (42.6)                                | 0.78    |
| Current smoker                                | 15 (38.5) (n = 39)                   | 14 (26.9) (n = 52)                       | 0.35    |
| Medical history, n (%)                        |                                      |                                          |         |
| Peripheral artery disease                     | 3 (7.5)                              | 5 (9.3)                                  | 1       |
| Myocardial revascularization                  | 8 (20)                               | 13 (24.1)                                | 0.83    |
| Chronic kidney failure                        | 4 (10)                               | 9 (16.7)                                 | 0.53    |
| ICD                                           | 0 (0)                                | 14 (25.9)                                | < 0.01  |
| COPD                                          | 2 (5)                                | 2 (3.7)                                  | 1       |
| Active cancer                                 | 4 (10)                               | 1 (1.9)                                  | 0.16    |
| Stroke                                        | 2 (5)                                | 7 (13.0)                                 | 0.29    |

|                                        |                               |                            |        |
|----------------------------------------|-------------------------------|----------------------------|--------|
| Previous medications, n (%)            |                               |                            |        |
| Aspirin                                | 17 (42.5)                     | 20 (37.0)                  | 0.75   |
| P2Y12 inhibitors                       | 9 (22.5)                      | 11 (20.4)                  | 1      |
| Vitamin K antagonist                   | 3 (7.5)                       | 9 (16.7)                   | 0.32   |
| Direct oral anticoagulant              | 0 (0)                         | 5 (9.3)                    | 0.13   |
| ACEi or ARBs                           | 11 (27.5)                     | 22 (40.7)                  | 0.27   |
| Sacubitril/valsartan                   | 0 (0)                         | 1 (2.0) (n = 51)           | 1      |
| Statins                                | 16 (40)                       | 22 (40.7)                  | 1      |
| Beta blockers                          | 9 (22.5)                      | 29 (53.7)                  | < 0.01 |
| Loop diuretics                         | 13 (32.5)                     | 27 (50)                    | 0.14   |
| Aldosterone antagonist                 | 4 (10)                        | 6 (11.1)                   | 1      |
| Thiazide diuretics                     | 4 (10.3) (n = 39)             | 2 (3.7)                    | 0.23   |
| Non-dihydropyridine CCB                | 0 (0)                         | 0 (0) (n = 53)             | NA     |
| Amiodarone                             | 7 (17.5)                      | 14 (26.4) (n = 53)         | 0.44   |
| Other antiarrhythmic                   | 3 (7.5)                       | 4 (7.5) (n = 53)           | 1      |
| Clinical presentation at admission     |                               |                            |        |
| Heart rate, mean $\pm$ SD, bpm         | 101.6 $\pm$ 36.0              | 102.3 $\pm$ 47.1           | 0.64   |
| SBP, mean $\pm$ SD, mmHg               | 103.7 $\pm$ 22.2              | 95.1 $\pm$ 24.2            | 0.09   |
| DBP, mean $\pm$ SD, mmHg               | 63.7 $\pm$ 16.3               | 59.3 $\pm$ 17.1            | 0.18   |
| MBP, mean $\pm$ SD, mmHg               | 76.6 $\pm$ 17.8               | 70.8 $\pm$ 19.2            | 0.16   |
| Sinus rhythm, n (%)                    | 18 (45)                       | 14 (25.9)                  | 0.09   |
| Mottling, n (%)                        | 14 (38.9) (n = 36)            | 24 (54.6) (n = 44)         | 0.24   |
| Cardiac arrest, n (%)                  | 15 (37.5)                     | 13 (24.1)                  | 0.24   |
| Blood tests at admission, median (IQR) |                               |                            |        |
| Sodium, mmol/L                         | 135 (132.5 – 139.5) (n = 39)  | 135 (133 – 138)            | 0.84   |
| Creatinin, $\mu$ mol/L                 | 115 (82.5 – 138.5) (n = 39)   | 138 (97 – 202.75)          | 0.03   |
| Bilirubin, mg/L                        | 12 (7.5 – 15) (n = 35)        | 21 (12 – 29.75) (n = 42)   | < 0.01 |
| Hemoglobin, g/dL                       | 13.2 (11.95 – 14.15) (n = 39) | 13 (10.5 – 14) (n = 53)    | 0.22   |
| Arterial blood lactates, mmol/L        | 2.88 (2 – 5.93) (n = 38)      | 2.59 (2 – 6.16) (n = 52)   | 0.99   |
| ASAT, UI/L                             | 185 (65.5 – 371.25) (n = 32)  | 96 (43 – 418.75) (n = 38)  | 0.42   |
| ALAT, UI/L                             | 87 (43 – 195) (n = 33)        | 97 (34.5 – 403.5) (n = 39) | 0.71   |

|                                    |                                  |                                   |        |
|------------------------------------|----------------------------------|-----------------------------------|--------|
| PT, %                              | 71 (55.3 – 86.8) (n = 38)        | 53.5 (32 – 73) (n = 52)           | < 0.01 |
| Nt-proBNP, pg/mL                   | 1,520 (487.8 – 5,629.3) (n = 14) | 6,787 (3,765 – 25,468.5) (n = 23) | 0.046  |
| BNP, pg/mL                         | 476 (207.5 – 2,016) (n = 11)     | 776.5 (435.5 – 1,818) (n = 16)    | 0.73   |
| CRP, mg/L                          | 10 (4 – 40) (n = 21)             | 15.5 (5.75 – 46.5) (n = 24)       | 0.96   |
| Baseline echocardiography          |                                  |                                   |        |
| LVEF, mean ± SD, %                 | 23.2 ± 12.0 (n = 39)             | 25.3 ± 14.0                       | 0.6    |
| TAPSE, median (IQR), mm            | 15 (11.3 – 17.5) (n = 16)        | 13.5 (10 – 15.3) (n = 16)         | 0.44   |
| PSVtdi, median (IQR), cm/s         | 9 (8 – 18) (n = 9)               | 8 (6 – 11.5) (n = 15)             | 0.23   |
| Severe mitral regurgitation, n (%) | 2 (5.4) (n = 37)                 | 8 (16) (n = 50)                   | 0.18   |
| Severe aortic stenosis, n (%)      | 0 (0) (n = 39)                   | 1 (1.9) (n = 53)                  | 1      |
| Severe aortic regurgitation, n (%) | 1 (2.6) (n = 39)                 | 1 (1.9) (n = 53)                  | 1      |

ACEi = angiotensin-converting enzyme inhibitor, ALAT = alanine aminotransferase, ARB = angiotensin receptor blockers, ASAT = aspartate aminotransferase, BNP = Brain natriuretic peptide, CCB = calcium channel blocker, COPD = chronic obstructive pulmonary disease, CRP = C-reactive protein, CS = cardiogenic shock, DBP = diastolic blood pressure, ICD = implantable cardiac defibrillator, IQR = interquartile range, LVEF = left ventricular ejection fraction, Nt-proBNP = N-terminal-pro hormone BNP, PSVtdi = peak systolic velocity tissue Doppler imaging, PT = prothrombin time, SBP = systolic blood pressure, SD = standard deviation, TAPSE = tricuspid annular plane systolic excursion, VA = ventricular arrhythmia

**Table S6** Clinical, echocardiographic, and biological parameters at 24h in the VA-triggered group according to cardiomyopathy.

|                                  | Ischemic VA-triggered CS<br>(n = 40) | Non-ischemic VA-triggered CS<br>(n = 54) | p value |
|----------------------------------|--------------------------------------|------------------------------------------|---------|
| Clinical presentation at 24h     |                                      |                                          |         |
| Heart rate, mean ± SD, bpm       | 92.3 ± 24.8 (n = 35)                 | 90 ± 27.1 (n = 48)                       | 0.7     |
| SBP, mean ± SD, mmHg             | 102.8 ± 24.5 (n = 35)                | 104.6 ± 18.4 (n = 48)                    | 0.8     |
| DBP, mean ± SD, mmHg             | 58.1 ± 11.4 (n = 35)                 | 62.2 ± 12.8 (n = 48)                     | 0.21    |
| MBP, mean ± SD, mmHg             | 73.2 ± 13.2 (n = 35)                 | 75.0 ± 13.5 (n = 48)                     | 0.91    |
| Sinus rhythm, n (%)              | 19 (65.5) (n = 29)                   | 23 (60.5) (n = 38)                       | 0.87    |
| Mottling, n (%)                  | 5 (17.2) (n = 29)                    | 9 (24.3) (n = 37)                        | 0.69    |
| Blood tests at 24h, median (IQR) |                                      |                                          |         |
| Sodium, mmol/L                   | 138 (135 – 140.5) (n = 35)           | 137 (133 – 140) (n = 48)                 | 0.42    |
| Creatinin, µmol/L                | 103 (81 – 157.5) (n = 35)            | 113 (90.25 – 195) (n = 48)               | 0.32    |
| Bilirubin, mg/L                  | 13.6 (9.25 – 16.08) (n = 26)         | 22 (12 – 34.5) (n = 31)                  | < 0.01  |
| Haemoglobin, g/dL                | 12.1 (11 – 13.13) (n = 32)           | 12 (10 – 14) (n = 36)                    | 0.96    |
| Arterial blood lactates, mmol/L  | 1.9 (1.1 – 2.55) (n = 27)            | 1.93 (1 – 2) (n = 29)                    | 0.65    |
| ASAT, UI/L                       | 307 (66 – 676) (n = 29)              | 68.5 (32.75 – 319.5) (n = 28)            | 0.06    |
| ALAT, UI/L                       | 104 (54 – 244) (n = 29)              | 76.5 (37.8 – 421.5) (n = 30)             | 0.84    |
| PT, %                            | 73.5 (62 – 89.5) (n = 34)            | 61 (42 – 73) (n = 45)                    | < 0.01  |
| Nt-proBNP, pg/mL                 | 5,070.5 (4,077.8 – 8,123) (n = 4)    | 10,271 (3,558 – 23,000) (n = 9)          | 0.6     |
| BNP, pg/mL                       | 1,215 (436.3 – 2,087) (n = 10)       | 1,460 (1,274.8 – 2,071.3) (n = 6)        | 0.87    |
| CRP, mg/L                        | 52 (31.8 – 81.3) (n = 14)            | 16 (8.5 – 103) (n = 11)                  | 0.25    |
| Echocardiography at 24h          |                                      |                                          |         |
| LVEF, mean ± SD, %               | 27.6 ± 11.6 (n = 28)                 | 29.0 ± 15.4 (n = 33)                     | 0.93    |
| TAPSE, median (IQR), mm          | 13 (10.5 – 18.5) (n = 7)             | 14.5 (12 – 17.5) (n = 12)                | 0.69    |
| PSVtdi, median (IQR), cm/s       | 12 (10 – 17.8) (n = 6)               | 10 (8.5 – 11) (n = 7)                    | 0.31    |

ALAT = alanine aminotransferase, ASAT = aspartate aminotransferase, BNP = Brain natriuretic peptid, CRP = C-reactive protein, CS = cardiogenic shock, DBP = diastolic blood pressure, IQR = interquartile range, LVEF = left ventricular ejection fraction, Nt-proBNP = N-terminal-pro hormone BNP, PSVtdi = peak systolic velocity tissue Doppler imaging, PT = prothrombin time, SBP = systolic blood pressure, SD = standard deviation, TAPSE = tricuspid annular plane systolic excursion, VA = ventricular arrhythmia

**Table S7 In-hospital management, short and long-term outcomes in the VA-triggered CS group according to the type of cardiomyopathy.**

|                                                            | Ischemic VA-triggered CS<br>(n = 40) | Non-ischemic VA triggered CS<br>(n = 54) | p value |
|------------------------------------------------------------|--------------------------------------|------------------------------------------|---------|
| Medications used, n (%)                                    |                                      |                                          |         |
| Dobutamine or norepinephrine or levosimendan               | 37 (92.5)                            | 44 (81.5)                                | 0.22    |
| Dobutamine                                                 | 34 (85)                              | 38 (70.4)                                | 0.16    |
| Norepinephrine                                             | 25 (62.5)                            | 32 (59.3)                                | 0.92    |
| Levosimendan                                               | 2 (5)                                | 3 (5.6)                                  | 1       |
| Respiratory support, n (%)                                 |                                      |                                          |         |
| Non-invasive                                               | 10 (25)                              | 14 (25.9)                                | 1       |
| Invasive                                                   | 19 (47.5)                            | 29 (53.7)                                | 0.70    |
| Short-term mechanical circulatory support, n (%)           |                                      |                                          |         |
| IABP                                                       | 6 (15)                               | 1 (1.85)                                 | 0.04    |
| Impella                                                    | 1 (2.5)                              | 1 (1.85)                                 | 1       |
| ECLS                                                       | 7 (17.5)                             | 9 (16.7)                                 | 1       |
| Renal replacement therapy, n (%)                           | 2 (5)                                | 11 (20.4)                                | 0.07    |
| LVEF at discharge, mean ± SD                               | 34.5 ± 9.0 (n = 20)                  | 41.5 ± 17.3 (n = 32)                     | 0.09    |
| Mortality, n (%)                                           |                                      |                                          |         |
| 1 month                                                    | 12 (30)                              | 13 (24.1)                                | 0.68    |
| 1 year                                                     | 17 (42.5)                            | 23 (42.6)                                | 1       |
| Rehospitalizations at 1 year, n (%)                        | 17 (45.9) (n = 37)                   | 24 (49.0) (n = 49)                       | 0.95    |
| Mortality or rehospitalizations at 1 year, n (%)           | 31 (83.8) (n = 37)                   | 40 (81.6) (n = 49)                       | 1       |
| Heart transplantation or VAD at 1 year, n (%)              | 2 (5)                                | 14 (25.9)                                | 0.02    |
| Mortality or heart transplantation or VAD at 1 year, n (%) | 19 (47.5)                            | 34 (63.0)                                | 0.20    |

CS = cardiogenic shock, ECLS = extracorporeal life support, IABP = intra-aortic balloon pump, LVEF = left ventricle ejection fraction, SD = standard deviation, VA = ventricular arrhythmia, VAD = ventricular assistant device

**Table S8 Antiarrhythmic therapies in the VA group according to cardiomyopathy.**

|                                | Ischemic VA-triggered CS<br>(n = 40) | Non-ischemic VA-triggered CS<br>(n = 54) | p value |
|--------------------------------|--------------------------------------|------------------------------------------|---------|
| Betablockers, n (%)            |                                      |                                          |         |
| Initial care                   | 9 (2.25)                             | 29 (53.7)                                | < 0.01  |
| 24h                            | 5 (14.3) (n = 35)                    | 10 (20.8) (n = 48)                       | 0.63    |
| Discharge                      | 19 (70.4) (n = 27)                   | 18 (47.4) (n = 38)                       | 0.11    |
| 1 year                         | 17 (81.0) (n = 21)                   | 12 (57.1) (n = 21)                       | 0.18    |
| Non-dihydropyridine CCB, n (%) |                                      |                                          |         |
| Initial care                   | 0 (0)                                | 0 (0) (n = 53)                           | NA      |
| 24h                            | 1 (2.94) (n = 34)                    | 0 (0) (n = 45)                           | 0.43    |
| Discharge                      | 0 (0) (n = 27)                       | 0 (0) (n = 35)                           | NA      |
| 1 year                         | 0 (0) (n = 20)                       | 0 (0) (n = 20)                           | NA      |
| Amiodarone, n (%)              |                                      |                                          |         |
| Initial care                   | 7 (17.5)                             | 14 (26.4) (n = 53)                       | 0.44    |
| 24h                            | 14 (41.2) (n = 34)                   | 28 (59.6) (n = 47)                       | 0.16    |
| Discharge                      | 5 (19.2) (n = 26)                    | 9 (25) (n = 36)                          | 0.82    |
| 1 year                         | 1 (5) (n = 20)                       | 2 (10) (n = 20)                          | 1       |
| Other anti-arrhythmic, n (%)   |                                      |                                          |         |
| Initial care                   | 3 (7.5)                              | 4 (7.6) (n = 53)                         | 1       |
| 24h                            | 4 (11.8) (n = 34)                    | 8 (17.4) (n = 46)                        | 0.7     |
| Discharge                      | 3 (11.1) (n = 27)                    | 3 (8.3) (n = 36)                         | 1       |
| 1 year                         | 2 (10) (n = 20)                      | 2 (10) (n = 20)                          | 1       |
| ICD implantation, n (%)        | 2 (5)                                | 9 (17.0) (n = 53)                        | 0.11    |
| VA catheter ablation, n (%)    | 4 (10)                               | 9 (17.0) (n = 53)                        | 0.51    |

CCB = calcium channel blocker, CS = cardiogenic shock, ICD = Implantable cardioverter-defibrillator, VA = ventricular tachycardia

**Table S9** Short and long-term outcomes in the VA group according to troponin level.

|                                                            | VA-triggered CS with high troponin (n = 13) | VA-triggered CS with low troponin (n = 81) | p value |
|------------------------------------------------------------|---------------------------------------------|--------------------------------------------|---------|
| Mortality, n (%)                                           |                                             |                                            |         |
| 1 month                                                    | 4 (30.8)                                    | 21 (25.9)                                  | 0.74    |
| 1 year                                                     | 6 (46.2)                                    | 34 (42)                                    | 1       |
| Rehospitalizations at 1 year, n (%)                        | 6 (46.2)                                    | 35 (47.9) (n = 73)                         | 1       |
| Mortality or rehospitalizations at 1 year, n (%)           | 11 (84.6)                                   | 60 (82.2) (n = 73)                         | 1       |
| Heart transplantation or VAD at 1 year, n (%)              | 1 (7.7)                                     | 15 (18.5)                                  | 0.46    |
| Mortality or heart transplantation or VAD at 1 year, n (%) | 7 (53.8)                                    | 46 (56.8)                                  | 1       |

High troponin was defined at the time of CS with a threshold of 10  $\mu$ UI/L for standard troponin I, of 200  $\mu$ g/L for high sensitivity troponin I and of 2000 ng/mL for high sensitivity troponin T. CS = cardiogenic shock, VA = ventricular arrhythmia, VAD = ventricular assist device



**FIGURE S1: All-cause mortality in the matched cohort according to a ventricular arrhythmia trigger**

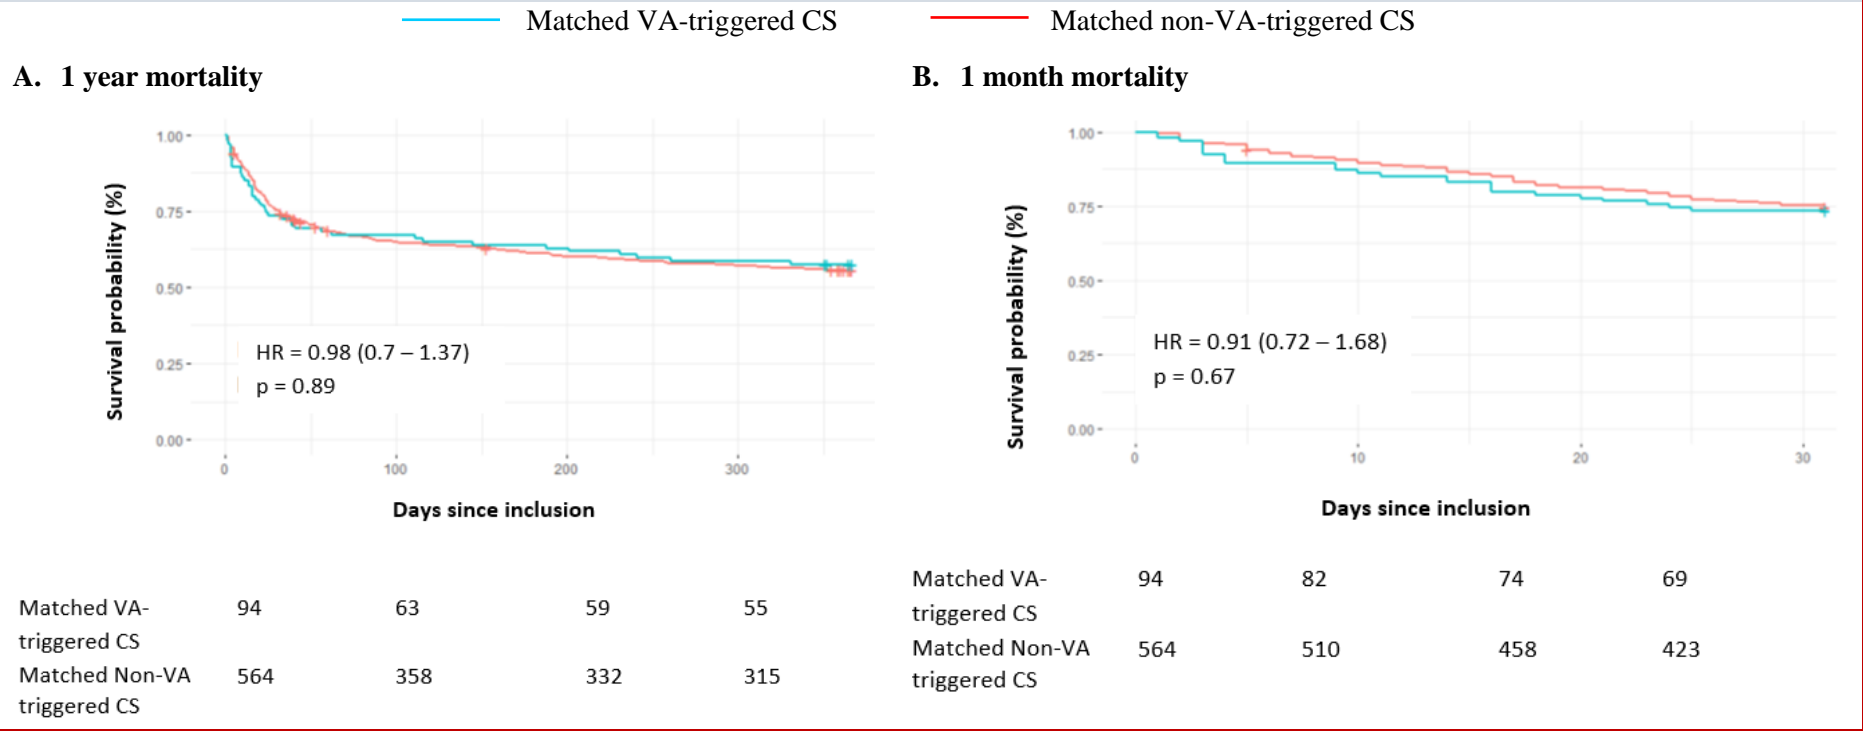

Panel A represents one-year overall mortality. Panel B focus on one-month mortality. The cumulative incidences of one-year and one-month mortality were estimated with the use of the Kaplan–Meier method; hazard ratios and 95% confidence intervals were estimated with the use of Cox regression models.

CS = cardiogenic shock, HR = hazard ratio, VA = ventricular arrhythmia

**FIGURE S2: Mortality outcomes in the VA group according to various types of ischemic heart disease.**

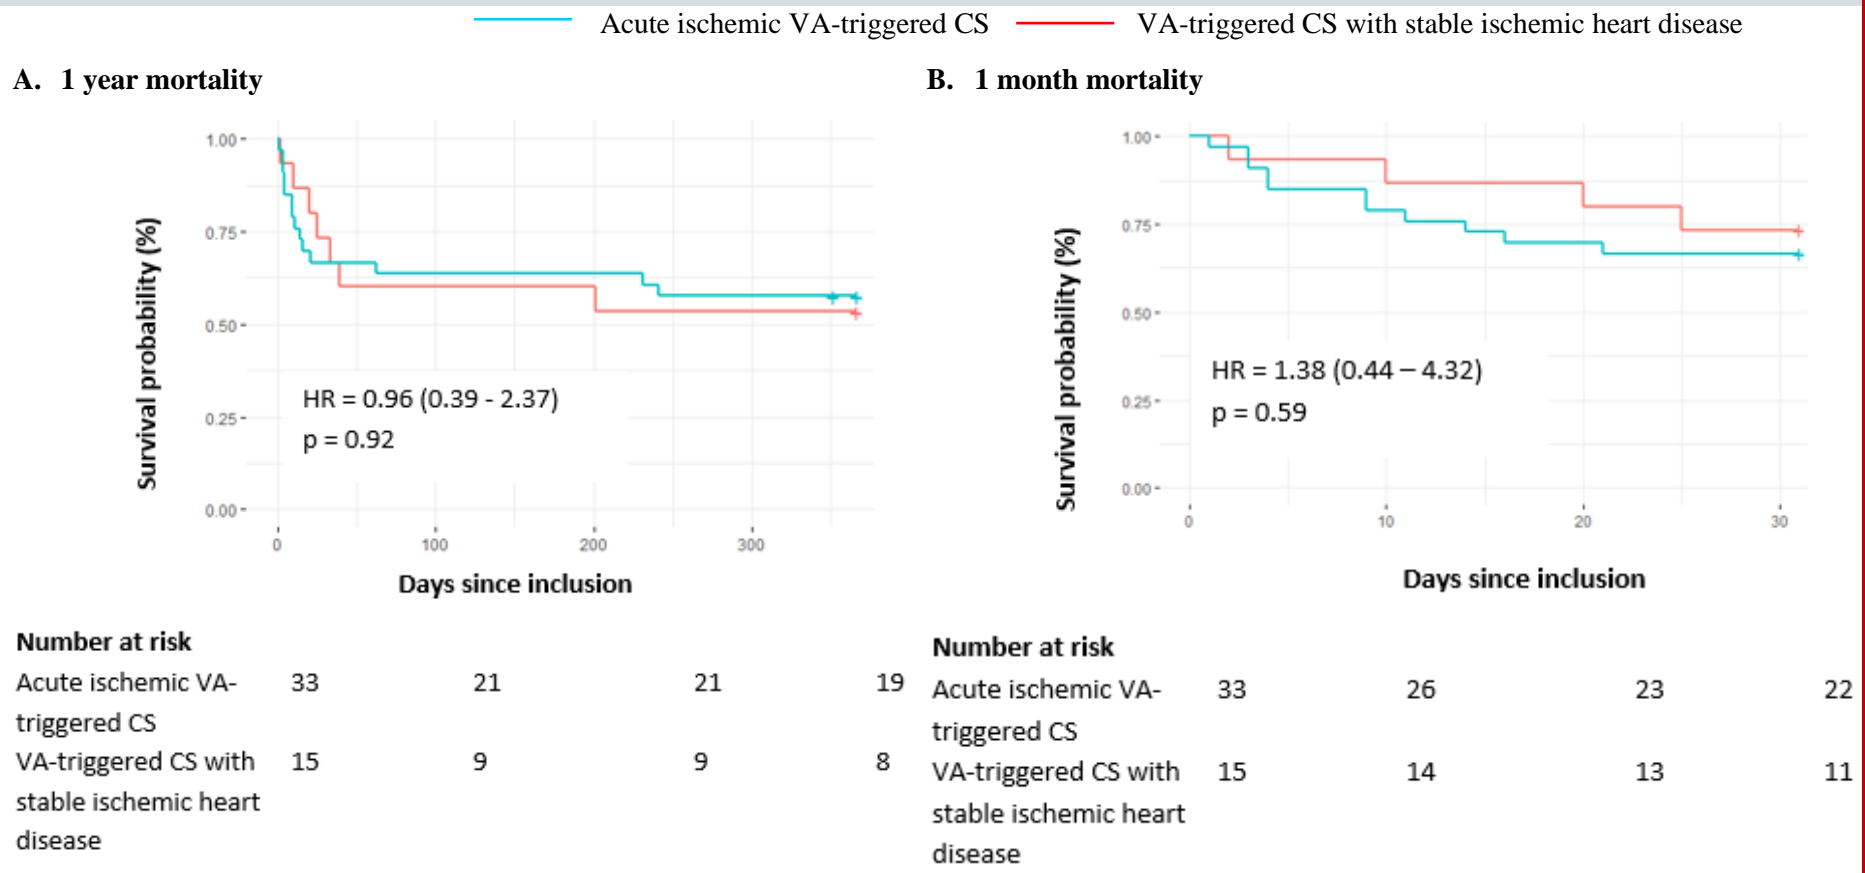

Panel A represents one-year overall mortality. Panel B focus on one-month mortality. The cumulative incidences of one-year and one-month mortality were estimated with the use of the Kaplan–Meier method; hazard ratios and 95% confidence intervals were estimated with the use of Cox regression models. Underlying cardiopathy was considered acute ischemic when indicated as such by managing physician. Ischemic heart disease was considered stable in case of previously known ischemic cardiomyopathy without new lesion on repeated coronary angiogram.

CS = cardiogenic shock, HR = hazard ratio, VA = ventricular arrhythmia

**FIGURE S3: Mortality outcomes in the VA group according to troponin level**

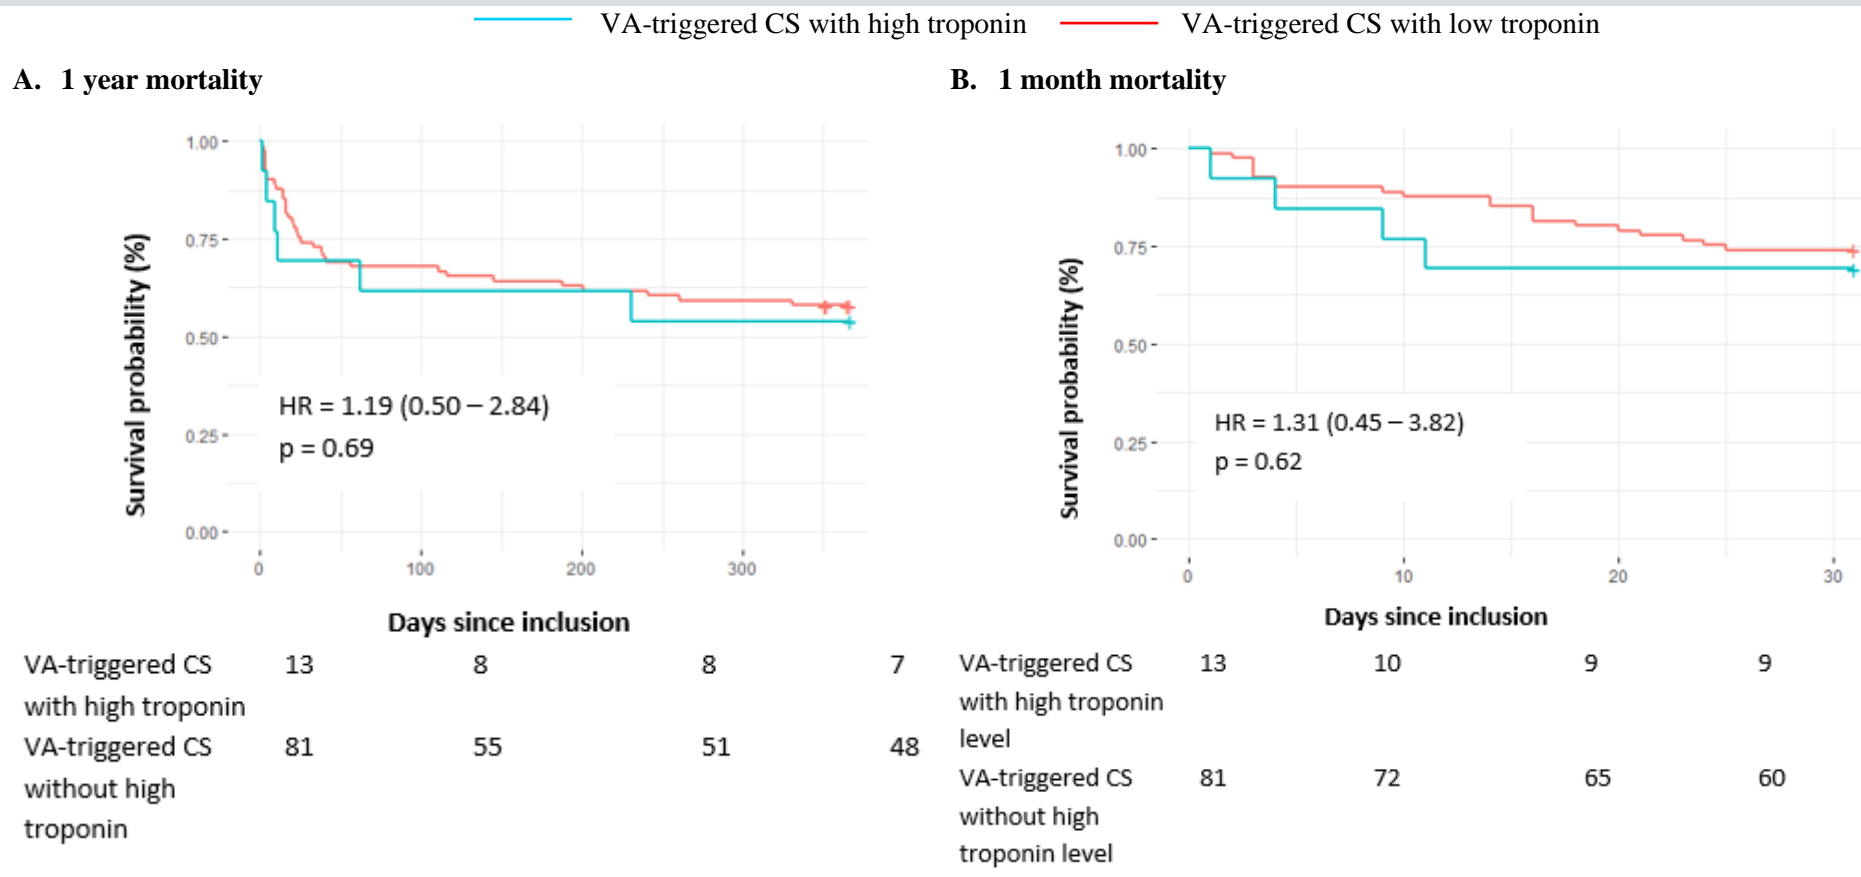

Panel A represents one-year overall mortality. Panel B focus on one-month mortality. The cumulative incidences of one-year and one-month mortality were estimated with the use of the Kaplan–Meier method; hazard ratios and 95% confidence intervals were estimated with the use of Cox regression models. The threshold for high troponin was set at 10  $\mu$ UI/L for standard troponin I, 200  $\mu$ g/L for high sensitivity troponin I, and 2000 ng/mL for high sensitivity troponin T.

CS = cardiogenic shock, HR = hazard ratio, VA = ventricular arrhythmia
